# Supplementary material for: Outward open conformation of a Major Facilitator Superfamily multidrug/H+ antiporter provides insights into switching mechanism
Source: PubMed Central journal article supplement (PMC6167325; doi:10.1038/s41467-018-06306-x), 2018-10-01
Supplement: 41467_2018_6306_MOESM1_ESM.pdf [file 41467_2018_6306_MOESM1_ESM.pdf]

## Supplementary Information

**Outward open conformation of a Major Facilitator Superfamily multidrug/H<sup>+</sup> antiporter provides insights into switching mechanism**

Kumar Nagarathinam *et al.*

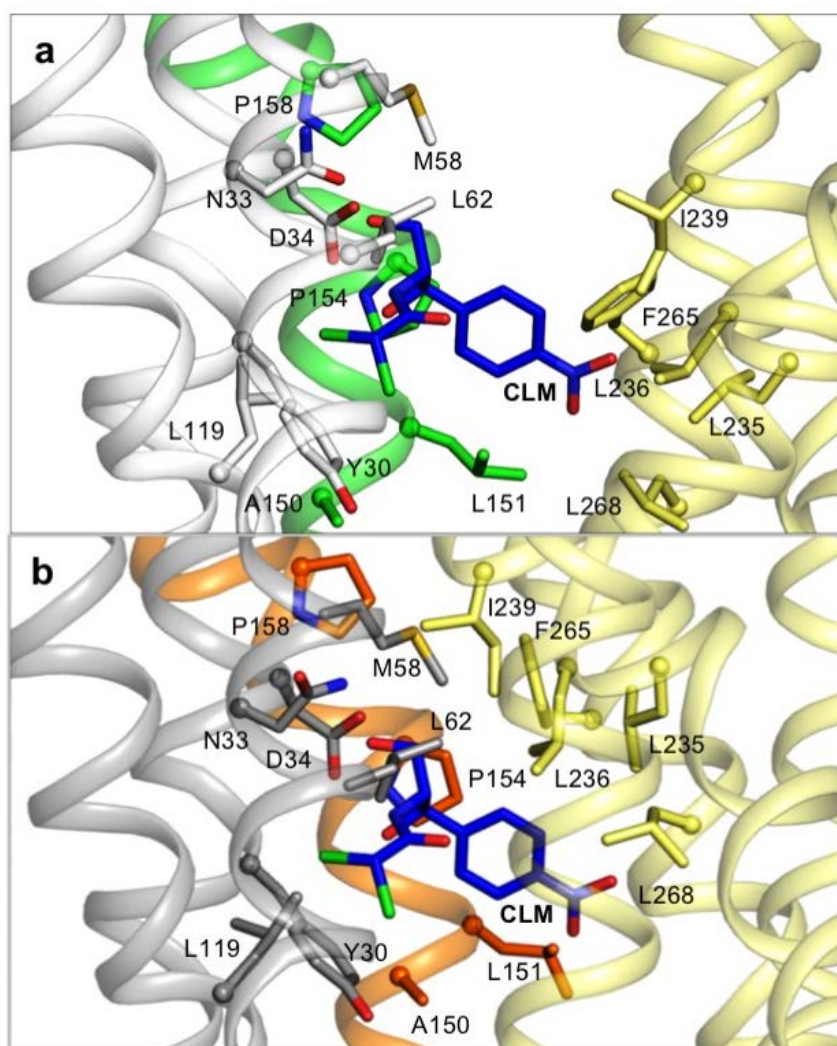

**Supplementary Figure 1: The drug binding site is open to the periplasmic space in the outward open conformation (a; orientation as in Figure 1). The chloramphenicol binding site (obtained by superposition of the N-terminal domain of PDB coordinates 4ZOW<sup>1</sup> in the inward open conformation (b) on the present structure) is not only accessible to the periplasm, but is disrupted in the O<sub>o</sub> state. Due to a distortion in TM5, N-terminal domain residues A150<sup>TM5</sup> and L151<sup>TM5</sup> disengage from the ligand, and rotation of the C-terminal domain results in displacement of residues from TM7 and TM8 by up to 8 Å (C $\alpha$  – C $\alpha$  distance).**

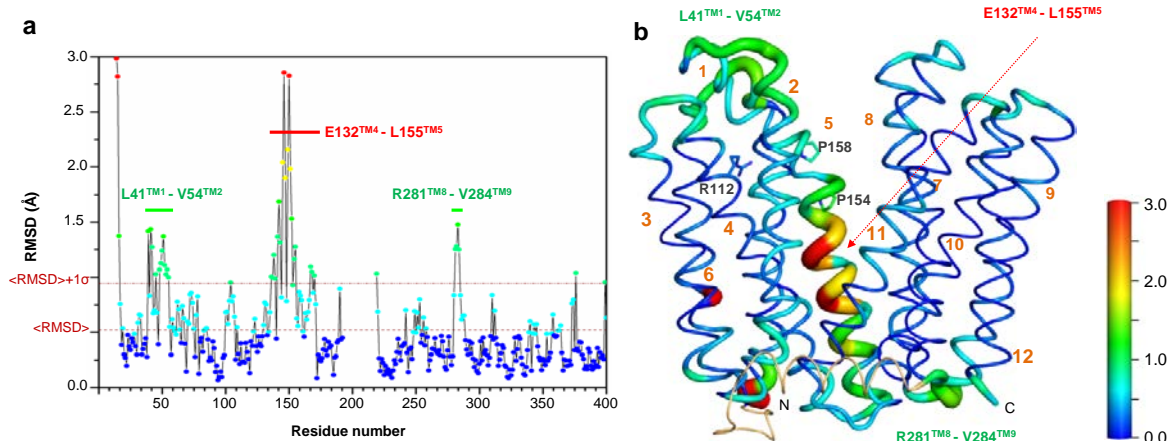

**Supplementary Figure 2: Superposition of the individual domains of MdfA in the  $I_f$  and  $O_o$  conformations reveals significant deviations in the N-terminal domain. (a)**  $C\alpha$  distance plots between  $O_o$  and  $I_f$  states as a function of residue number after separate superposition of the N- and C-terminal domains. Lines marking the mean  $\langle\text{RMSD}\rangle$  (0.5211 Å) and  $\langle\text{RMSD}\rangle + 1\sigma$  ( $\sigma = 0.4242$  Å = standard deviation of RMSD values from the mean) values are shown. Three regions of the sequence show significant deviations between the  $O_o$  and  $I_f$  structures: Glu132<sup>TM4</sup>-Leu155<sup>TM5</sup>, Leu41<sup>TM1</sup>-Val54<sup>TM2</sup> and Arg281<sup>TM8</sup>-Val284<sup>TM9</sup>. The latter region, which represents the contact site for the TM5 N-terminal residues in the  $O_o$  state (see Figure 2), shows structural variation in the  $I_f$  conformation in the presence of different ligands<sup>1,2</sup>, so that we assume that this exhibits inherent plasticity and does not play a major role in transitioning between the two states. (b) Projection of the  $C\alpha$  distance values per residue on the  $O_o$  structure described here using the PyMOL programme. Regions with large and small distances are depicted using thick and thin radii respectively, colored as a spectrum from blue (0.1 Å) to red (3.0 Å).

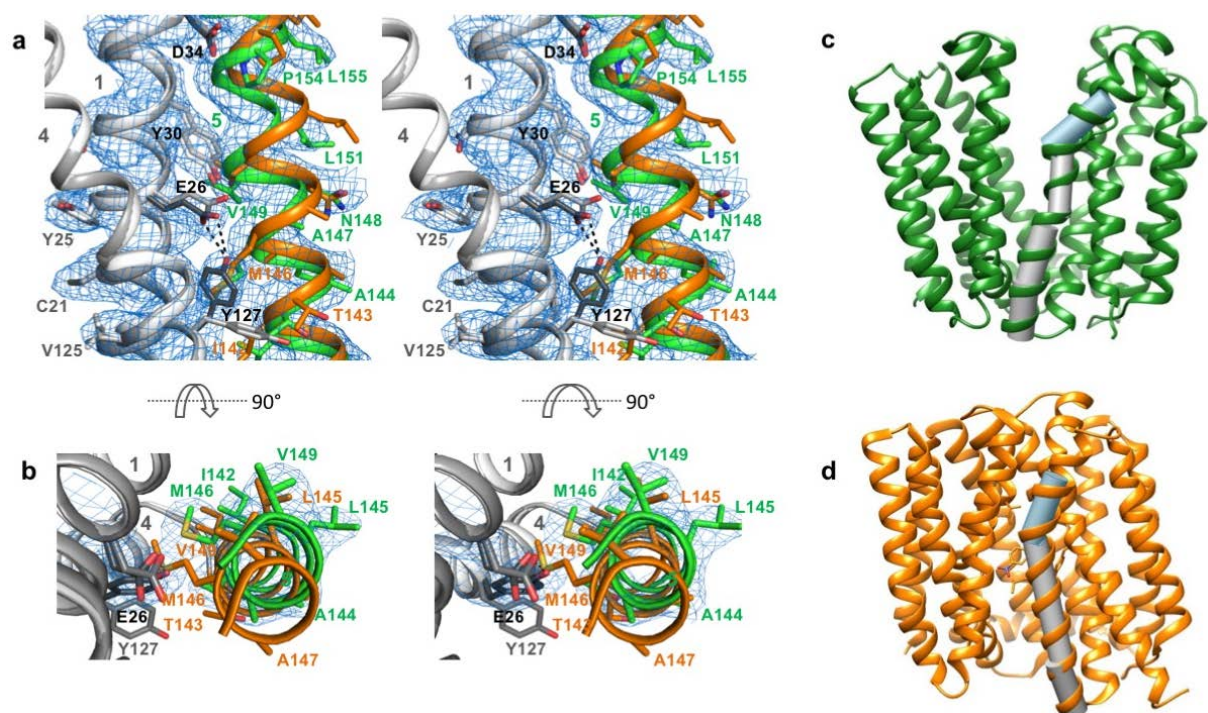

**Supplementary Figure 3: Electron densities ( $2F_o-F_c$  contoured at  $1\sigma$ , in stereo) for MdfA in the  $O_o$  conformation, superimposed with coordinates of the final ( $O_o$ , green) and initial ( $I_f$ , orange) models. (a) Electron density for TM5 in the  $O_o$  conformation, oriented as in **Figure 1**. Overlay of the N-terminal domain from the  $I_f$  conformation (light grey, green) fails to satisfy electron density for TM5. (b) As in (a), rotated  $90^\circ$  about a horizontal axis. See also accompanying **Supplementary Movie 1**. (c, d) Depiction of TM5 helix direction in the  $O_o$  (orange) and  $I_f$  (green) crystal structures calculated using the program Kink Finder<sup>3</sup>; the two-proline-containing antiporter motif C "153AlaProXaaXaaGlyPro158" of TM5 is shown as a blue cylinder.**

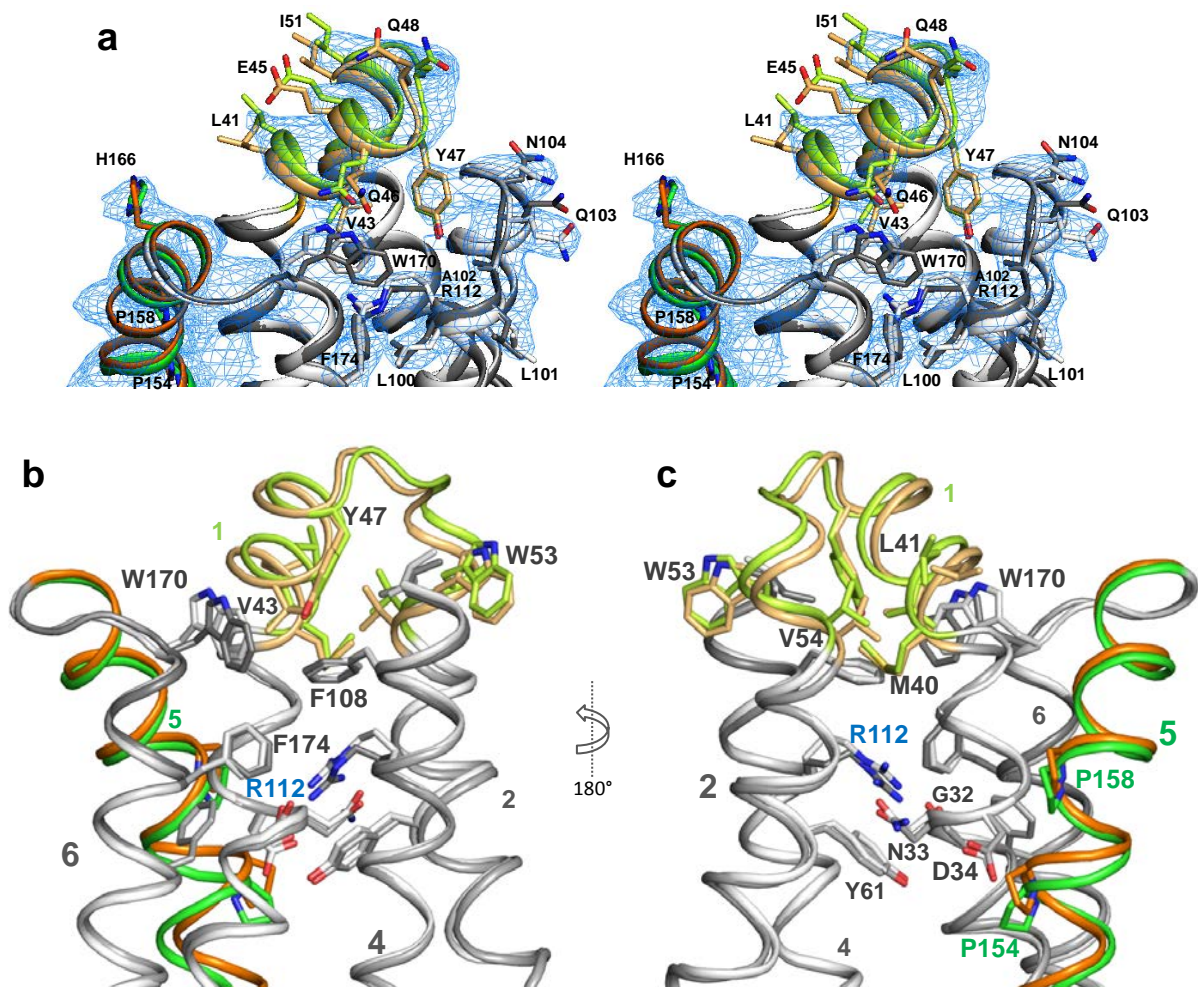

**Supplementary Figure 4: Small but significant differences are observed in the hydrophobic core near the periplasmic face of the N-terminal domain. (a)** Electron density ( $2F_o - F_c$  contoured at  $1\sigma$ , in stereo) for the hydrophobic core in stereo representation. **(b, c)** The core is in contact with the buried guanidinyli moiety of conserved Arg112<sup>TM4</sup> (motif B), which in turn is connected to Asn33<sup>TM1</sup>-Asp34<sup>TM1</sup> by a hydrogen bond network (not shown). View **(b)** from the “left” of **Figure 1** and **(c)** rotated  $180^\circ$  about a vertical axis.

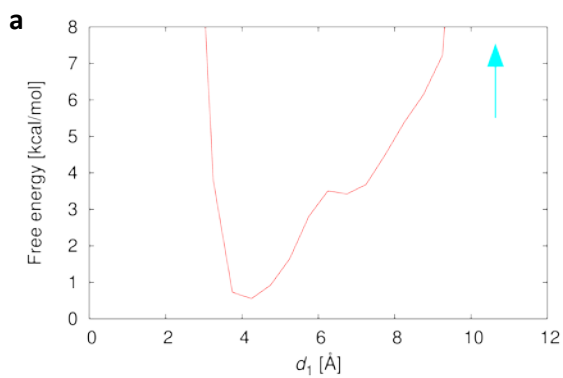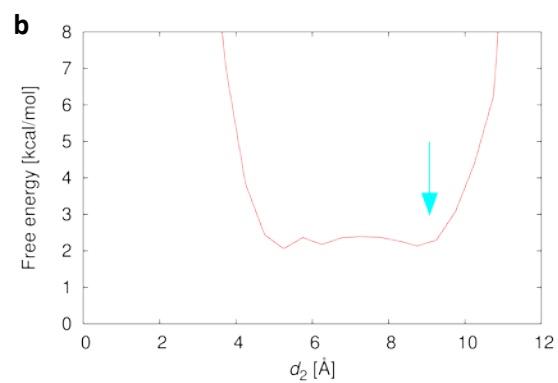

**Supplementary Figure 5: Free energy profiles calculated from the distribution of (a)  $d_1$  in the MD run  $O_o(E26^-/D34p)$  and (b)  $d_2$  in the MD run  $I_r(E26^-/D34p)$ . The cyan arrows indicate the  $d_1$  and  $d_2$  values in the initial structures respectively.**

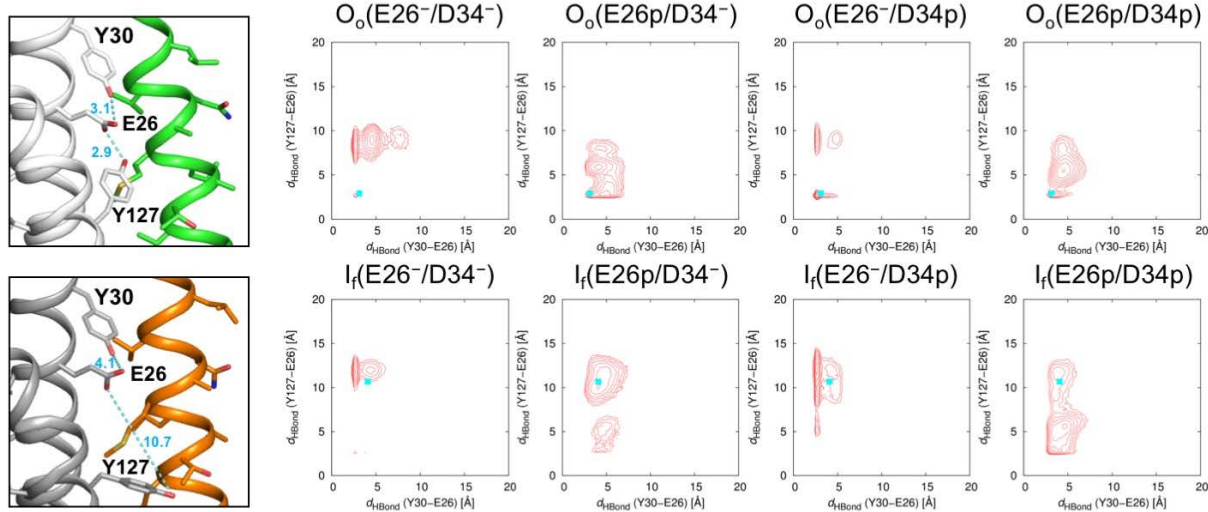

**Supplementary Figure 6: Conformational distributions of the transporter during molecular dynamics simulations as a function of starting conformation ( $O_o$  vs.  $I_f$ ) and Glu26/Asp34 protonation states.** Plotted are the distances between the Glu26<sup>TM1</sup> carboxylate and the hydroxyl groups of Tyr127<sup>TM4</sup> (vertical axes) and Tyr30<sup>TM1</sup> (horizontal axes). Cyan squares depict distances in the respective initial crystal structures (left).

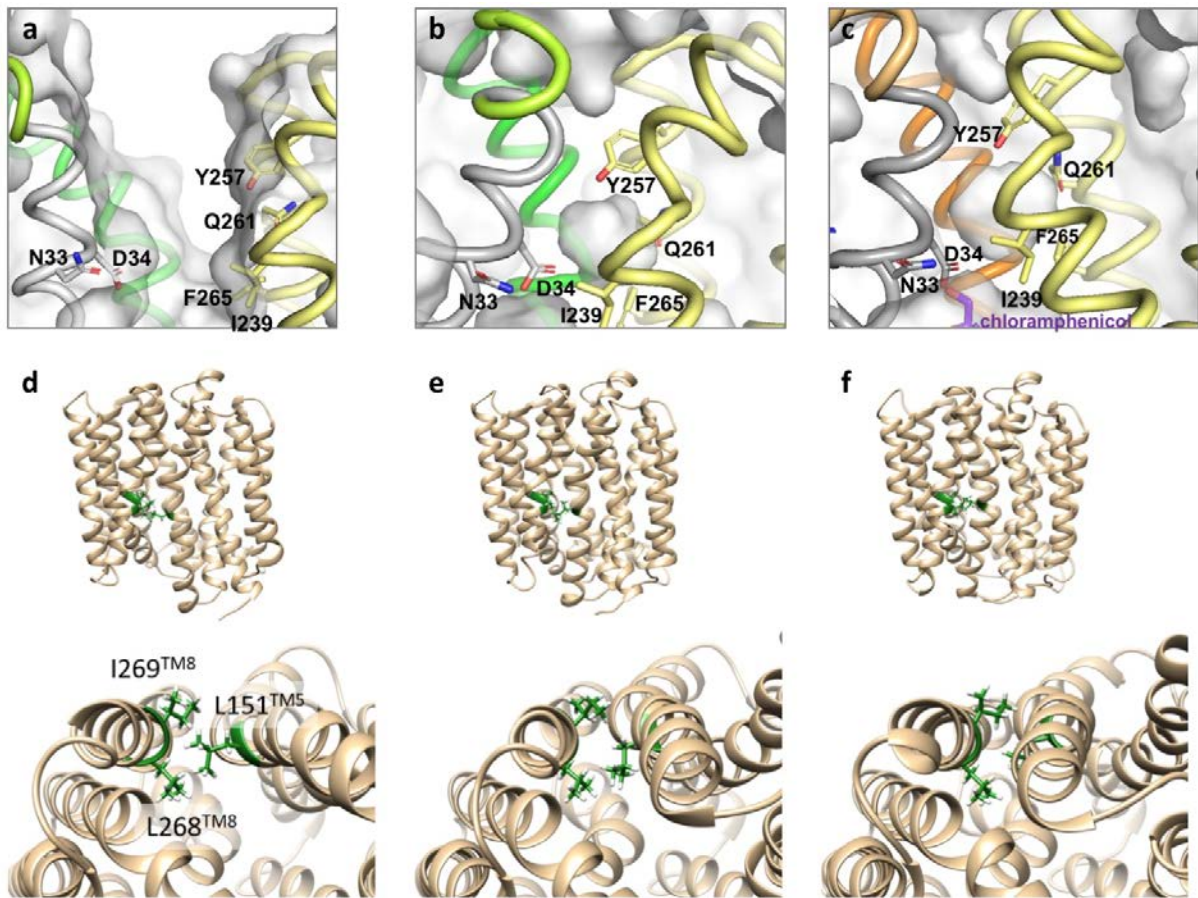

**Supplementary Figure 7: Snapshots from the MD simulation trajectories. (a-c)** Protonation of Asp34<sup>TM5</sup> in the O<sub>o</sub> state (a) results in an occluded state (b) in which the Asp34<sup>TM5</sup> side chain juxtaposes an internal cavity (closed surface) bounded by Tyr257<sup>TM7</sup>, Gln261<sup>TM8</sup>, Ile239<sup>TM7</sup> and Phe265<sup>TM8</sup>. A similar cavity is found in the chloramphenicol-bound I<sub>f</sub> structure (c). (d-f) TM5 undergoes twisting during the transition from the I<sub>f</sub> structure to the occluded state. Lateral and cytoplasmic views of the snapshot structures at 0.5 (d), 0.6 (e), and 1.0 μs (f) of the I<sub>f</sub>(E26<sup>-</sup>/D34<sup>P</sup>) runs are shown in the upper and lower panels, respectively. Sidechain atoms of L151<sup>TM5</sup>, L268<sup>TM8</sup> and I269<sup>TM8</sup> are shown in a stick representation. Carbon and hydrogen atoms are colored green and white, respectively.



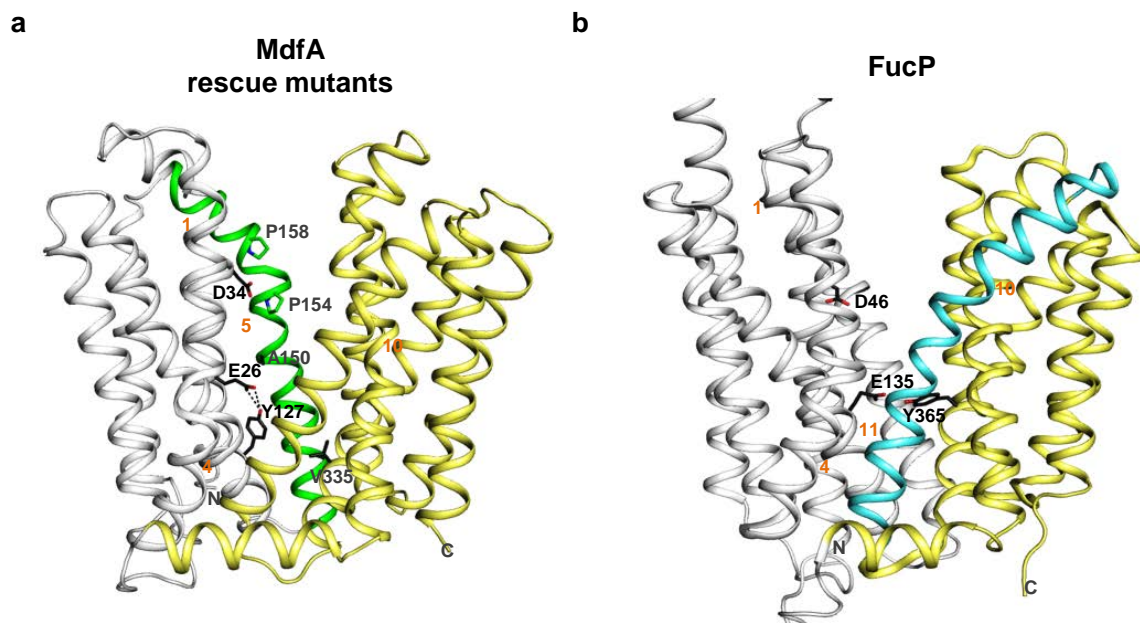

**Supplementary Figure 8: Similarities in MdfA rescue mutants and the symporter FucP.** (a) Selection for drug transport rescue in cells harboring the otherwise inactive TM1 variants Glu26<sup>TM1</sup>Thr/Asp34<sup>TM1</sup>Met and Glu26<sup>TM1</sup>Thr resulted in the detection of mutants containing the acidic side chains Ala150<sup>TM5</sup>Glu and Val335<sup>TM10</sup>Glu<sup>4,5</sup>. These residues would be well positioned to make hydrogen bonds to Tyr127<sup>TM4</sup> in the outward open structure. (b) Recent thermodynamic calculations and molecular dynamic simulations have led in principle to similar conclusions for the L-fucose/H<sup>+</sup> symporter FucP<sup>6</sup>. Using computational methods, it was proposed that protonation of FucP Glu135<sup>TM4</sup> in TM4 allows surmounting of a ca. 2 kcal mol<sup>-1</sup> energy barrier between the inward and outward open states. An intermediate state in which TM11 is distorted is postulated, although a causative link between Glu135<sup>TM4</sup> (de)protonation and TM11 distortion has not been described. Inspection of the FucP structure<sup>7</sup> suggests that Glu135<sup>TM4</sup> could form a hydrogen bond with Tyr365<sup>TM10</sup> of C-domain TM10.

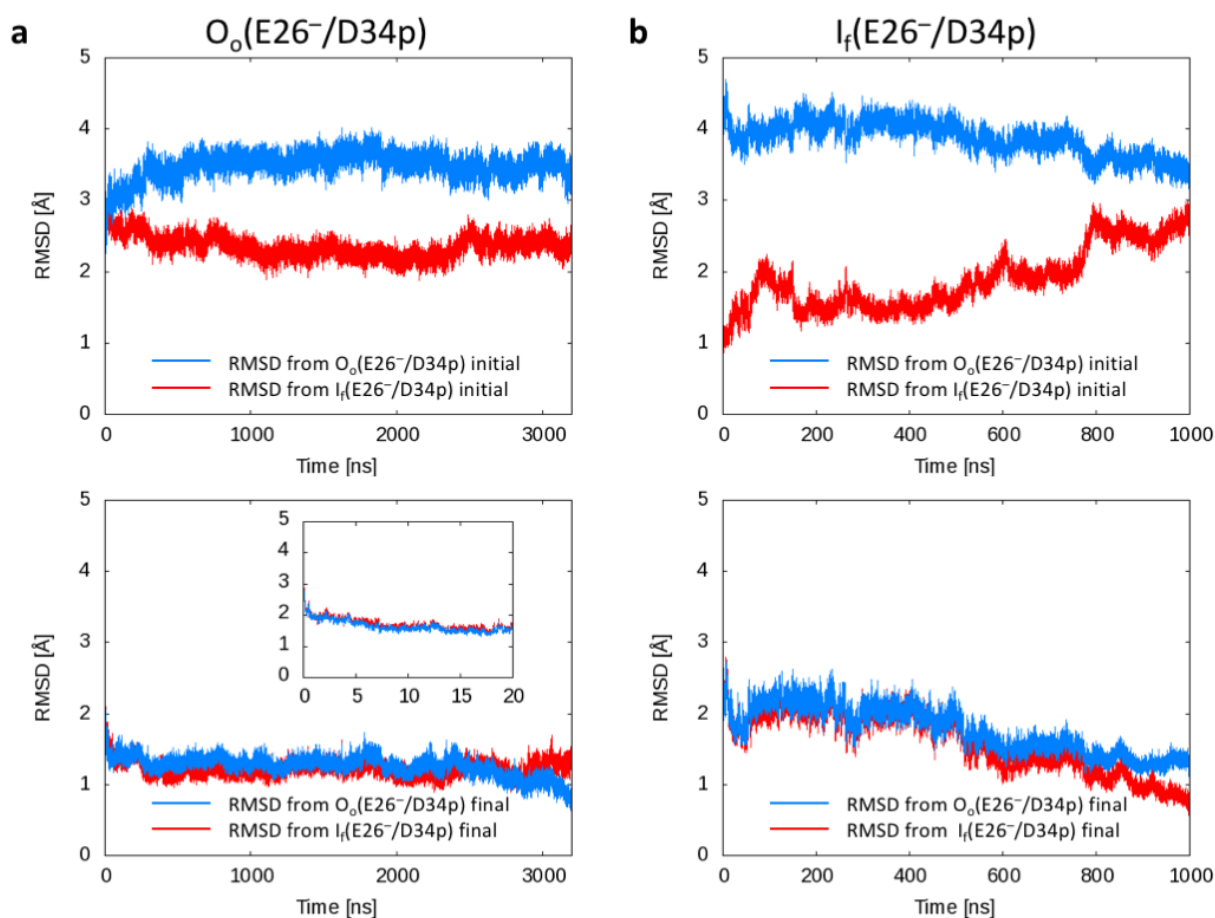

**Supplementary Figure 9. Time evolution of the RMSDs from the initial (upper panels) and final (lower panels) structures of the  $O_o(E26^-/D34p)$  (blue lines) and  $I_f(E26^-/D34p)$  (red lines) MD runs. (a)  $O_o(E26^-/D34p)$  and (b)  $I_f(E26^-/D34p)$ . The inset shows the RMSDs from the final structures of the MD run  $O_o(E26^-/D34p)$  for the time from 0 to 20 ns. RMSDs were calculated for C $\alpha$  atoms.**

**Supplementary Table 1. RMSDs of MD simulation snapshots from the crystal structure**

| Aligned residues <sup>a</sup>                 | RMSD <sup>b</sup> [Å] |
|-----------------------------------------------|-----------------------|
| All <sup>c</sup>                              | 2.59 ± 0.27           |
| TM helices <sup>d</sup>                       | 2.46 ± 0.22           |
| N-lobe TM helices <sup>e</sup>                | 1.45 ± 0.21           |
| C-lobe TM helices <sup>f</sup>                | 1.08 ± 0.11           |
| Periplasmic halves of TM helices <sup>g</sup> | 2.84 ± 0.29           |
| Cytoplasmic halves of TM helices <sup>h</sup> | 1.77 ± 0.14           |

<sup>a</sup>Before calculating RMSD, the coordinates of the C $\alpha$  atoms of the designated residues of each snapshot structure in the trajectory were aligned with those of the corresponding atoms of the crystal structure.

<sup>b</sup>Mean  $\pm$  standard deviation.

<sup>c</sup>Residues 14–400.

<sup>d</sup>Residues 14–46, 53–79, 81–101, 105–133, 136–164, 171–191, 219–246, 254–278, 284–308, 313–340, 346–398.

<sup>e</sup>Residues 14–46, 53–79, 81–101, 105–133, 136–164, 171–191.

<sup>f</sup>Residues 219–246, 254–278, 284–308, 313–340, 346–398.

<sup>g</sup>Residues 33–46, 53–63, 99–101, 105–113, 155–164, 171–171, 233–246, 254–264, 298–308, 313–321, 361–387.

<sup>h</sup>Residues 14–32, 64–79, 81–98, 114–133, 136–154, 172–191, 219–232, 265–278, 284–297, 322–340, 346–360, 388–398.

**Supplementary Table 2. Primers used for site direct mutagenesis**

|          | Sequence (5' to 3')                       |
|----------|-------------------------------------------|
| E26Q-Fw  | CTGTCTGGTGCTTTACCAATTTTCAACCTATATCGG      |
| E26Q-Rv  | CCGATATAGGTTGAAAATTGGTAAAGCACCAGACAG      |
| D34N-Fw  | TTTCAACCTATATCGGCAACAATATGATTCAACCCGGTATG |
| D34N-Rv  | CATACCGGGTTGAATCATATTGTTGCCGATATAGGTTGAAA |
| Y127A-Fw | CATTGGCGCTGTGGGAGCGGCCGCAATTCAGG          |
| Y127A-Rv | CCTGAATTGCGGCCGCTCCCACAGCGCCAATG          |
| Y127F-Fw | CATTGGCGCTGTGGGATTTGCCGCAATTCAGG          |
| Y127F-Rv | CCTGAATTGCGGCAAATCCCACAGCGCCAATG          |
| M146A-Fw | TCAAGATCACCGCGCTGGCGGCGAACGTGGCGCTGATTG   |
| M146A-Rv | CAATCAGCGCCACGTTCCGCCGCCAGCGCGGTGATCTTGA  |
| W170A-Fw | GTGGATCCATGTGCTGCCCGCGGAGGGGATGTTTGTTTTG  |
| W170A-Rv | CAAAACAAACATCCCCTCCGCGGGCAGCACATGGATCCAC  |

**Supplementary Table 3. Conditions for MD simulations**

| Run                                                  | Initial conformation | State of Glu26 <sup>TM1</sup> | State of Asp34 <sup>TM1</sup> |
|------------------------------------------------------|----------------------|-------------------------------|-------------------------------|
| O <sub>o</sub> (E26 <sup>-</sup> /D34 <sup>-</sup> ) | O <sub>o</sub>       | negatively charged            | negatively charged            |
| O <sub>o</sub> (E26 <sup>P</sup> /D34 <sup>-</sup> ) | O <sub>o</sub>       | protonated                    | negatively charged            |
| O <sub>o</sub> (E26 <sup>-</sup> /D34 <sup>P</sup> ) | O <sub>o</sub>       | negatively charged            | protonated                    |
| O <sub>o</sub> (E26 <sup>P</sup> /D34 <sup>P</sup> ) | O <sub>o</sub>       | protonated                    | protonated                    |
| I <sub>f</sub> (E26 <sup>-</sup> /D34 <sup>-</sup> ) | I <sub>f</sub>       | negatively charged            | negatively charged            |
| I <sub>f</sub> (E26 <sup>P</sup> /D34 <sup>-</sup> ) | I <sub>f</sub>       | protonated                    | negatively charged            |
| I <sub>f</sub> (E26 <sup>-</sup> /D34 <sup>P</sup> ) | I <sub>f</sub>       | negatively charged            | protonated                    |
| I <sub>f</sub> (E26 <sup>P</sup> /D34 <sup>P</sup> ) | I <sub>f</sub>       | protonated                    | protonated                    |

## Supplementary References

1. Heng, J. *et al.* Substrate-bound structure of the *E. coli* multidrug resistance transporter MdfA. *Cell Res.* **25**, 1060–1073 (2015).
2. Liu, M., Heng, J., Gao, Y. & Wang, X. Crystal structures of MdfA complexed with acetylcholine and inhibitor reserpine. *Biophys Rep* **2**, 78–85 (2016).
3. Wilman, H. R., Shi, J. & Deane, C. M. Helix kinks are equally prevalent in soluble and membrane proteins. *Proteins* **82**, 1960–1970 (2014).
4. Sigal, N., Fluman, N., Siemion, S. & Bibi, E. The secondary multidrug/proton antiporter MdfA tolerates displacements of an essential negatively charged side chain. *J. Biol. Chem.* **284**, 6966–6971 (2009).
5. Adler, J. & Bibi, E. Promiscuity in the geometry of electrostatic interactions between the *Escherichia coli* multidrug resistance transporter MdfA and cationic substrates. *J. Biol. Chem.* **280**, 2721–2729 (2005).
6. Liu, Y., Ke, M. & Gong, H. Protonation of Glu135 Facilitates the Outward-to-Inward Structural Transition of Fucose Transporter. *Biophysical Journal* **109**, 542–551 (2015).
7. Dang, S. *et al.* Structure of a fucose transporter in an outward-open conformation. *Nature* **467**, 734–738 (2010).
