# Supplementary material for: Outward open conformation of a Major Facilitator Superfamily multidrug/H+ antiporter provides insights into switching mechanism
Source: PubMed Central journal article supplement (PMC6167325; doi:10.1038/s41467-018-06306-x), 2018-10-01
Supplement: 41467_2018_6306_MOESM3_ESM.pdf [file 41467_2018_6306_MOESM3_ESM.pdf]

## Description of Additional Supplementary Files

File Name: Supplementary Movie 1

Description: **Conformational changes in TM5 and the hydrophobic core** (c.f. Figures 2, 3 and Supplementary Figures 3 and 4). Fit of  $O_o$  and  $I_f$  coordinates to  $2F_o - F_c$  electron density contoured at  $1\sigma$ , with morphs between the structures. Movie prepared using PyMOL.
